# Supplementary material for: Critical Parameters in an Enzymatic Way to Obtain the Unsweet Lactose-Free Milk Using Catalase and Glucose Oxidase Co-Encapsulated into Hydrogel with Chemical Cross-Linking
Source: MDPI journal article supplement (doi:10.3390/foods12010113), 2022-12-26
Supplement: s1 [file s1]

# Supplementary Materials

Table S1. Glucose conversion yield [%] during one-pot biocatalysis (GOX- glucose oxidase from *Aspergillus niger*, CAT - the recombinant catalase preparation isolated from psychrotolerant bacteria *Serratia* sp.. glucose 27.5 g/L, 0.1M HEPES buffer pH 6.6, 12°C, CaCO<sub>3</sub> 4 g/L, without aeration).

| GOX [g/L] | CAT [g/L] | Glucose conversion [%] |       |       |
|-----------|-----------|------------------------|-------|-------|
|           |           | Time [hours]           |       |       |
|           |           | 1.33                   | 4     | 7.9   |
| 0.6       | 0.2       | 18.51                  | 25.01 | 38.88 |
| 1.2       | 0.2       | 25.06                  | 29.14 | 44.64 |
| 2         | 0.2       | 29.77                  | 33.52 | 46.73 |
| 3         | 0.2       | 35.92                  | 38.12 | 52.09 |
| 4         | 0.2       | 38.81                  | 40.97 | 55.6  |
| 0.6       | 0.6       | 21.47                  | 42.06 | 55.66 |
| 1.2       | 0.6       | 26.37                  | 43.9  | 57.49 |
| 2         | 0.6       | 35.97                  | 47.85 | 62.58 |
| 3         | 0.6       | 37.41                  | 49.12 | 64.37 |
| 4         | 0.6       | 40.9                   | 52.14 | 68.11 |
| 0.6       | 1         | 24.24                  | 45.23 | 59.19 |
| 1.2       | 1         | 29.9                   | 48.67 | 62.27 |
| 2         | 1         | 34.09                  | 51.94 | 68.05 |
| 3         | 1         | 39.68                  | 56.32 | 71.32 |
| 4         | 1         | 39.85                  | 67.91 | 86.21 |
| 6         | 1         | 44.68                  | 72.56 | 89.93 |
| 8         | 1         | 48.81                  | 75.05 | 90.68 |
| 6         | 1.2       | 42.27                  | 72.21 | 84.94 |
| 8         | 1.2       | 50.96                  | 79.09 | 90.98 |
